# Supplementary material for: How Marine Emissions of Bromoform Impact the Remote Atmosphere
Source: Copernicus journal article supplement (doi:10.5194/acp-2018-1194), 2018-12-14
Supplement: Supplementary file [file acp-2018-1194-AC1-supplement.pdf]

Dear Referee #1

We thank the referee for his/her valuable comments, which helped to improve the manuscript. We have reorganized our discussions to make the main point clearer and revised other comments accordingly. The changed parts in the manuscript are marked in red. The following is a point-by-point response.

**Anonymous Referee #1**

**Received and published: 14 January 2019**

**I have read the paper, entitled “How Marine Emissions of Bromoform Impact the Remote Atmosphere”, by Yue Jia et al. and find it needs some revision before publication.**

**The paper quantitatively underscores the interplay between emissions, loss or degradation, and transport in determining the concentrations of bromoform in the atmosphere.**

**It is especially valuable because of its use of observations to test model results. It would be nice if the authors went further and used other oceanic and atmospheric observations that are available as well, but the paper as it stands is a good start on using this kind of approach to understand the behavior of CHBr<sub>3</sub> in the atmosphere.**

Answer: We added comparisons with aircraft campaigns of CAST and CONTRAST and other model studies in the discussion session.

**My biggest concern is that the discussion bounces around too much, making it difficult to draw out the major points of the paper. If the authors can fix that and focus the paper on the major points, it should be good to go.**

**General Comments**

**The authors need to be sure they are clear when discussing models and observations. Certain parts of the paper have to be read a couple of times to be sure which is which, and we don't want the readers confusing simulations with reality. Also, be specific and consistent with terminology. “Boundary layer”, for example, could replace “atmosphere” in several places in the paper. It's good to avoid using the word “concentration” to describe atmospheric amounts, which are better expressed as “mixing ratio” or “mole fraction”. Overall, I think reorganizing the discussion around the major points they want to make would make the paper easier to understand and put less of a strain on the reader.**

Answer: We revised our manuscript according to the suggestions, especially the discussion parts. See detailed responses below.

**Specific comments**

**Title: Add “on” after “Impact”**

Answer: Added

**Abstract:** Delete first sentence Line 12: Insert “of CHBr<sub>3</sub> and other VSLH’s” after “emissions”.

**Line 13:** Insert “on” after “impact”. **Line 15:** Insert “assumed” before “uniform”; delete “on the one hand”. **Line 16:** Insert “consistent with those” before “observed”.

Answer: Corrected as suggested.

**Emissions were not measured on those cruises, but calculated using a variety of assumptions.**

Answer: “observed” is replaced by “derived”

**Delete “on the other hand”.**

Answer: Deleted.

**Line 17:** Replace “due to” with “in the”.

**Line 18:** Insert “scenario” after emissions.

**Lines 19&20:** Insert comma after “scales”; delete “the” before “atmospheric”; replace “the distributions of” with “distributing”.

**Line 24:** Insert “s” after “Ocean”; change “increases” to “increase”.

Answer: Revised as suggested.

**Lines 30&31:** Delete sentence. It’s too general, maybe not entirely true, and for others in the world to decide.

**Line 31:** Delete “Significantly” and capitalize “Our”. **Line 32:** Second “VSLH” should probably be “VSLHs” to denote plural.

Answer: The sentence of Lines 30&31 is deleted and the other parts are revised as suggested.

**Introduction:**

**Line 40:** Replace “which” with “that”. **Line 49:** Delete “quite”. **Line 60:** Delete “very”.

**Line 71:** Insert “ocean” before “surface”.

Answer: Corrected as suggested.

**Data and Methods**

**Background**

**First paragraph, second sentence is redundant. This was already said in the introduction. I think the specificity belongs here in the methods, but the attribution (citations) for the two statements is different. The authors might consider using the attributions for the intro statement here and then deleting the sentence in the intro, thus keeping the intro general. Or they could omit it here if they prefer.**

Answer: We just keep the sentence in this part and the sentence in the intro section is deleted.

**Line 133:** Insert comma after “shelf”.

Answer: Corrected.

**Modeling**

**Lines 160-164 and elsewhere in the methods section:** Try to keep to one tense. Use of present tense for something that has already happened or already been done makes for awkward reading, especially when mixed with past tense to describe the same. Prefer

**present tense for describing things that are already understood or “true” in the broader sense.**

Answer: We went through the method section and corrected the tenses as suggested.

**Atmospheric CHBr<sub>3</sub> (background). . .**

**Although it contains some good points, I find this section meandering and confusing. I believe it would benefit from some reorganization. I can derive what the authors are getting at, but only after several readings. Because this section is about what was learned from the transport model with constant emissions, it might be an easier read if the authors could state simply what the model demonstrates, then point out how data from each cruise supports those points in the model or where they differ. (But I think that is for the discussion on “hot spots”, or am I missing something?) For example, the statement on lines 239-240 summarizes a major point. It would be good to lead with that or another similar statement, then follow with a discussion about the features it demonstrates, and then go to the data if appropriate. Then go to another point in a similar fashion.**

Answer: We reorganized this part with the suggested structure. Each of the paragraph begins with a summarized statement and followed by detailed discussions.

The sentences at the beginning of the paragraphs in the manuscript are: “**In this section, we show the impact of atmospheric transport patterns on the atmospheric CHBr<sub>3</sub> distribution, with the uniform background CHBr<sub>3</sub> emission simulations.**” in lines 204-205 “**The relationship mentioned above also holds on a global scale**” in line 254; and “**In the above simulations, we assume a constant background emission in order to isolate the impact of transport and loss processes on the atmospheric CHBr<sub>3</sub> distribution.**” in lines 293-294.

**BTW, lines 260-262 are redundant for a second time (i.e., third mention), but if the authors want to reiterate that point, it should be at the beginning of the section, not in the middle.**

Answer: This sentence has been moved to the beginning of the section and changed to “**In this section, we show the impact of atmospheric transport patterns on the atmospheric CHBr<sub>3</sub> distribution, with the uniform background CHBr<sub>3</sub> emission simulations.**” in lines 204-205.

**Some specific points here that may or may not be helpful:**

**Line 191: I believe the authors mean “boundary layer mixing ratios” or “mixing ratios in the lower atmosphere” rather than “atmospheric” here?**

Answer: We’ve replaced “atmospheric CHBr<sub>3</sub> mixing ratios” here by “CHBr<sub>3</sub> mixing ratios in the lower atmosphere”.

**Lines 215 and 220: I think I know what the authors are trying to say, but it’s not possible to accumulate the amount of a gas through transport and mixing, and these statements come across as though that’s what they are saying. I think they want to state this more carefully, perhaps invoking how wind engages with the ocean surface while diluting what is emitted? Or is it simply about how the winds and mixing and loss redistribute CHBr<sub>3</sub>?**

Answer: Here we refer to the redistribution of CHBr<sub>3</sub> by transport. To avoid ambiguity, we replaced “accumulation” with “higher background mixing ratios”. The mixing ratios of the depend on the particles that “fall” within the output grid cells. In the regions of convergence or low wind speeds, where particles could gather or move slowly, it is possible to “accumulate” enough particles to produce high mixing ratios, the description of mixing ratio calculation is added in Sec. 2. In the manuscript, the added part is:

“Output data in form of CHBr<sub>3</sub> volume mixing ratios (*VMR*) available at a user-defined grid, were calculated by:

$$VMR = \left(\frac{c_T}{\rho_a}\right) \cdot \left(\frac{m_a}{m_T}\right) \quad (3)$$

where  $c_T$  is the CHBr<sub>3</sub> mass concentration,  $\rho_a$  is the density of the air, and  $m_a$  and  $m_T$  are the molecular weight of air and CHBr<sub>3</sub>, respectively.

For each grid cell, the CHBr<sub>3</sub> mass concentration is given by:

$$C_T = \frac{1}{V} \sum_{i=1}^N m_i f_i \quad (4)$$

with  $m_i$  being the mass of CHBr<sub>3</sub> for particle  $i$ ,  $f_i$  the mass fraction of CHBr<sub>3</sub> of particle  $i$  attributed to the respective grid cell,  $N$  the total number of the particles, and  $V$  the volume of the grid cell (Stohl et al., 2005). We run FLEXPART in the non-domain filling mode, therefore the particle distribution is not correlated with air density. Particles, and thus bromoform, can accumulate in regions of low wind speeds where the relatively long residence time allows that oceanic emissions constantly add new particles. Similarly, particles can accumulate in regions of convergence where horizontal inflow pools marine boundary layer air from different regions.” in lines 185-198.

**Line 222: It’s really not a big leap to hypothesize that winds reduce the mixing ratios in the boundary layer. I think the valuable story is about how the wind shear and degradation can influence the distributions.**

Answer: Thanks for the suggestion. We revised this sentence as “the interplay between wind speed and convergence may influence the CHBr<sub>3</sub> distribution” and added a new figure (new Fig. 5) to demonstrate it.

In the manuscript, the added sentences are “In order to validate the hypothesis, we show a violin plot of regional background CHBr<sub>3</sub> mixing ratios related to convergence/divergence, and to the wind speeds averaged over each simulation period in Fig. 5. For the TransBrom case, the averaged ranges of mixing ratios in regions of convergence and divergence (Fig. 5a) go up to 0.7 ppt and 0.5 ppt, respectively, with interquartile ranges of 0.1-0.35 ppt and 0.05-0.21 ppt. Probability of mixing ratios larger than 0.2 ppt is much higher for regions of convergence compared to regions of divergence. Meanwhile, in the regions grouped by wind speed (Fig. 5b), higher CHBr<sub>3</sub> mixing ratios are more likely to occur in regions with lower wind speeds (i.e. in the regions of 0.0-5.0 m/s, mixing ratio go up to 0.65 ppt, while in the regions of 10-15 m/s, mixing ratio go up to 0.25 ppt). Similar distributions also occur for the SHIVA case. During the OASIS case, the CHBr<sub>3</sub> mixing ratios are much smaller than for the other two cases due to stronger winds. Highest mixing ratios (~0.15 to ~0.2 ppt) are found in the regions of convergence (Fig. 5e). However, higher mixing ratios are also generally found in the regions of higher wind speeds (Fig. 5f), as the regions of convergence locate in the regions of high wind speed during the OASIS case. The distributions suggest that in general higher CHBr<sub>3</sub> mixing ratios tend to occur in the regions of convergence or lower wind speed, with the exception of the OASIS case where extremely high winds occurred and coincided with regions of convergence.” in lines 239-253.

**Lines 224-225: “time period” is redundant; “respectively” is almost always unnecessary.**

Answer: “time period” and “respectively” are deleted.

**Lines 228-229: Again, are these actually accumulations or higher concentrations as the result of dispersal? The former requires emissions of some sort and I don't think that is what this section is about (i.e, constant emissions everywhere).**

Answer: "accumulations" here refers to higher concentrations. See the detailed response to the last comment on this point.

### **Atmospheric CHBr<sub>3</sub> (hotspots)**

#### **Observed**

**Lines 289-90. Delete "on the other hand"**

Answer: Deleted.

**Line 290: What is meant by "background" here? I would not use "background" in this paper in any sense other than defined in lines 191-92.**

Answer: The "background" here refers to lower emissions during the campaigns. Sorry for the confusion it caused with the "background emissions" defined previously. We have revised this sentence as "All three campaigns show periods with localized elevated and hotspot emissions."

**Lines 297-298: How does windspeed dominate the flux? Do the authors mean it is dominating the variability in the flux?**

Answer: "air-sea flux" is replaced by "variability of air-sea flux".

**Lines 306-308: What happened to transport? It's not all just source and loss. And I'm curious, how is loss being handled? I presume it is variable in the atmosphere based on absorption bands etc.?**

Answer: Transport is also included in "loss" here. To avoid ambiguity, we revised the sentence as "interplay of source, transport, and loss processes".

In the manuscript, we described the loss process by adding:

"... **Chemical decay of CHBr<sub>3</sub> was accounted for by:**

$$m(t + \Delta t) = m(t) \exp(-\Delta t/\beta) \quad (2)$$

where  $m$  is the particle mass,  $\beta = T_{1/2}/\ln(2)$  is the  $e$ -folding lifetime of CHBr<sub>3</sub>, and  $T_{1/2}$  is the half-life of CHBr<sub>3</sub> (Stohl et al., 2005). In our study, a half-life of 17 days ( $e$ -folding lifetime of 24 days) is prescribed to CHBr<sub>3</sub> during all runs (Montzka and Reimann, 2011)." in lines 151-156.

**Lines 339-342: Figure 7 is observations, not models. What is meant here?**

Answer: In the following section we'll compare the atmospheric mixing ratios due to background emissions and localized elevated emissions. We show the figure here because the localized elevated emissions used in the simulations are derived from the observations.

**Lines 349-350: Delete the "hand" phrases. Line 357: "Hand" again. Delete.**

Answer: Deleted.

**Lines 381-384: This is an important statement. Don't lose it during the revision.**

### **Summary**

**Just a thought. The summary could be trimmed and used as the abstract of the paper, as it focuses on "what we did, what we found, and what it means", which is all that is really needed in an abstract.**

**Line 392: Replace "revealing" with "demonstrating the role of"; delete "important".**

Answer: Revised as suggested

**Line 401: Insert comma after “location”.**

Answer: Inserted

**Line 416: Replace “produce” with “allow”.**

Answer: Replaced.

Thanks again for all your valuable comments, hope all your concerns have been addressed.
